# Supplementary material for: Radiotherapy-related Gastrointestinal Adverse Events in Rectal Cancer: Risk Factor Analysis and Predictive Modeling Using Clinical and Small Bowel Dosimetric Features
Source: Research Square preprint supplement (doi:10.21203/rs.3.rs-7461232/v1), 2025-10-27
Supplement: Supplementary file 1 [file 8fb023eb2698c105a259a197.docx]

| **Supplementary Tables 1** Correlation Analysis of Characteristics with Acute Upper Gastrointestinal Inflammation as the Outcome  Note: Outcome presence was coded as 1 and absence as 0. | | | | | | | | | |
| --- | --- | --- | --- | --- | --- | --- | --- | --- | --- |
| **Variable** | | **Correlation** | | **p-value** | | **Mean_1** | | **Mean_0** | |
| **Age** | | 0.0773 | | 0.2704 | | 54.38 | | 52.51 | |
| **Gender** | |  | | 0.0088 | |  | |  | |
| **Vsmall intestine** | | 0.1296 | | 0.1023 | | 715.55 | | 549.52 | |
| **Small intestine Dmax** | | -0.1412 | | 0.0748 | | 4430.05 | | 4776.84 | |
| **Small intestine Dmean** | | -0.0783 | | 0.3249 | | 1687.03 | | 1876.81 | |
| **Small intestine_V50%** | | -0.1397 | | 0.1818 | | 1.33 | | 2.7 | |
| **Small intestine_V45%** | | 0.033 | | 0.7006 | | 13.73 | | 12.8 | |
| **Small intestine_V40%** | | 0.0554 | | 0.5154 | | 20.21 | | 18.23 | |
| **Small intestine_V30%** | | 0.0575 | | 0.4909 | | 31.77 | | 29.05 | |
| **Small intestine_V20%** | | -0.0358 | | 0.6646 | | 45.62 | | 47.92 | |
| **Small intestine_V10%** | | -0.0799 | | 0.3248 | | 50.96 | | 56.66 | |
| **Small intestine_V50cc** | | 0.0268 | | 0.7987 | | 13.69 | | 11.84 | |
| **Small intestine_V45cc** | | 0.0836 | | 0.3295 | | 73.97 | | 61.36 | |
| **Small intestine_V40cc** | | 0.0993 | | 0.2432 | | 108.35 | | 88.56 | |
| **Small intestine_V30cc** | | 0.1023 | | 0.219 | | 176.31 | | 144.99 | |
| **Small intestine_V20cc** | | 0.0554 | | 0.5024 | | 251.13 | | 226.96 | |
| **Small intestine_V10cc** | | 0.0294 | | 0.717 | | 281.96 | | 266.83 | |
| **Diagnosis** | |  | | 0.769 | |  | |  | |
| **Number of Beams** | | 0.026 | | 0.713 | | 6.19 | | 6.13 | |
| **Fraction number** | | -0.0297 | | 0.6746 | | 25.06 | | 25.15 | |
| **Radiation dose** | | 0.1148 | | 0.102 | | 5347.1 | | 5252.59 | |
| **Distance from the anal Verge** | | -0.0408 | | 0.5898 | | 5.33 | | 5.53 | |
| **tumor length** | | 0.0288 | | 0.6983 | | 5.77 | | 5.6 | |
| **T** | |  | | 0.9912 | |  | |  | |
| **N** | |  | | 0.9002 | |  | |  | |
| **M** | |  | | 0.8563 | |  | |  | |
| **Supplementary Tables 2** Correlation Analysis of Characteristics with Acute Lower Gastrointestinal Inflammation as the Outcome  Note: Outcome presence was coded as 1 and absence as 0. | | | | | | | | |
| **Variable** | **Correlation** | | **p-value** | | **Mean_1** | | **Mean_0** | |
| **Age** | 0.009 | | 0.899 | | 53.25 | | 53.04 | |
| **Gender** |  | | 0.1629 | |  | |  | |
| **Vsmall intestine** | 0.0435 | | 0.5876 | | 628.55 | | 576.38 | |
| **small intestine Dmax** | -0.049 | | 0.5405 | | 4603.3 | | 4716.17 | |
| **small intestine Dmean** | -0.0636 | | 0.4272 | | 1748.32 | | 1891.9 | |
| **small intestine_V50%** | 0.0378 | | 0.7204 | | 2.45 | | 2.11 | |
| **small intestine_V45%** | -0.0062 | | 0.9429 | | 13.16 | | 13.32 | |
| **small intestine_V40%** | -0.0199 | | 0.8171 | | 18.65 | | 19.3 | |
| **small intestine_V30%** | -0.0095 | | 0.9099 | | 29.86 | | 30.27 | |
| **small intestine_V20%** | -0.0284 | | 0.7325 | | 46.48 | | 48.16 | |
| **small intestine_V10%** | -0.0673 | | 0.4101 | | 52.7 | | 57.14 | |
| **small intestine_V50cc** | 0.148 | | 0.1591 | | 17.27 | | 7.72 | |
| **small intestine_V45cc** | 0.0937 | | 0.2782 | | 72.55 | | 59.59 | |
| **small intestine_V40cc** | 0.0841 | | 0.3267 | | 102.98 | | 87.67 | |
| **small intestine_V30cc** | 0.0787 | | 0.3482 | | 166.5 | | 144.48 | |
| **small intestine_V20cc** | 0.1158 | | 0.1626 | | 259.14 | | 212.44 | |
| **small intestine_V10cc** | 0.1129 | | 0.1661 | | 299.61 | | 245.83 | |
| **Diagnosis** |  | | 0.3969 | |  | |  | |
| **Number of Beams** | -0.006 | | 0.9325 | | 6.17 | | 6.18 | |
| **Fraction number** | -0.1545 | | 0.0289 | | 24.91 | | 25.37 | |
| **Radiation dose** | -0.1566 | | 0.0261 | | 5227.98 | | 5350.54 | |
| **Distance from the anal Verge** | -0.0159 | | 0.835 | | 5.42 | | 5.5 | |
| **tumor length** | 0.0893 | | 0.2304 | | 5.88 | | 5.4 | |
| **T** |  | | 0.5656 | |  | |  | |
| **N** |  | | 0.9534 | |  | |  | |
| **M** |  | | 0.7162 | |  | |  | |

| **Supplementary Tables 3** Correlation Analysis of Characteristics with Late radiation proctitis as the Outcome  Note: Outcome presence was coded as 1 and absence as 0. | | | | |
| --- | --- | --- | --- | --- |
| **Variable** | **Correlation** | **p-value** | **Mean_1** | **Mean_0** |
| **Age** | -0.0838 | 0.2311 | 51.97 | 53.93 |
| **Gender** |  | 0.8374 |  |  |
| **Vsmall intestine** | 0.2108 | 0.0073 | 775.44 | 509.58 |
| **small intestine Dmax** | -0.0296 | 0.7093 | 4621.51 | 4693.05 |
| **small intestine Dmean** | -0.015 | 0.8501 | 1810.48 | 1846.16 |
| **small intestine_V50%** | -0.1672 | 0.1053 | 1.18 | 2.77 |
| **small intestine_V45%** | -0.013 | 0.8788 | 12.96 | 13.31 |
| **small intestine_V40%** | -0.0132 | 0.8768 | 18.66 | 19.11 |
| **small intestine_V30%** | 0.0417 | 0.6156 | 31.44 | 29.53 |
| **small intestine_V20%** | 0.0104 | 0.9 | 48.12 | 47.48 |
| **small intestine_V10%** | -0.0101 | 0.901 | 55.01 | 55.71 |
| **small intestine_V50cc** | -0.1042 | 0.3148 | 7.51 | 14.53 |
| **small intestine_V45cc** | 0.0711 | 0.4059 | 72.5 | 62.13 |
| **small intestine_V40cc** | 0.0812 | 0.3387 | 105.24 | 89.69 |
| **small intestine_V30cc** | 0.1177 | 0.1557 | 178.79 | 143.91 |
| **small intestine_V20cc** | 0.131 | 0.1101 | 273.33 | 217.5 |
| **small intestine_V10cc** | 0.1284 | 0.1112 | 316.43 | 251.87 |
| **Diagnosis** |  | 0.451 |  |  |
| **Number of Beams** | 0.0481 | 0.4945 | 6.23 | 6.13 |
| **Fraction number** | -0.0015 | 0.9828 | 25.12 | 25.12 |
| **Radiation dose** | -0.0526 | 0.4541 | 5254.43 | 5296.43 |
| **Distance from the anal verge** | -0.1775 | 0.0181 | 4.96 | 5.8 |
| **tumor length** | 0.029 | 0.6956 | 5.74 | 5.58 |
| **T** |  | 0.1493 |  |  |
| **N** |  | 0.8345 |  |  |
| **M** |  | 0.6844 |  |  |
